# Supplementary material for: Molecular determinants of ER–Golgi contacts identified through a new FRET–FLIM system
Source: PubMed Central journal article supplement — J Cell Biol. 2019 Mar 4;218(3):1055–65. doi: 10.1083/jcb.201812020 (PMC6400564; doi:10.1083/jcb.201812020), 2019-03-04
Supplement: JCB_201812020_sm.pdf [file JCB_201812020_sm.pdf]

Supplemental material

Venditti et al., <https://doi.org/10.1083/jcb.201812020>

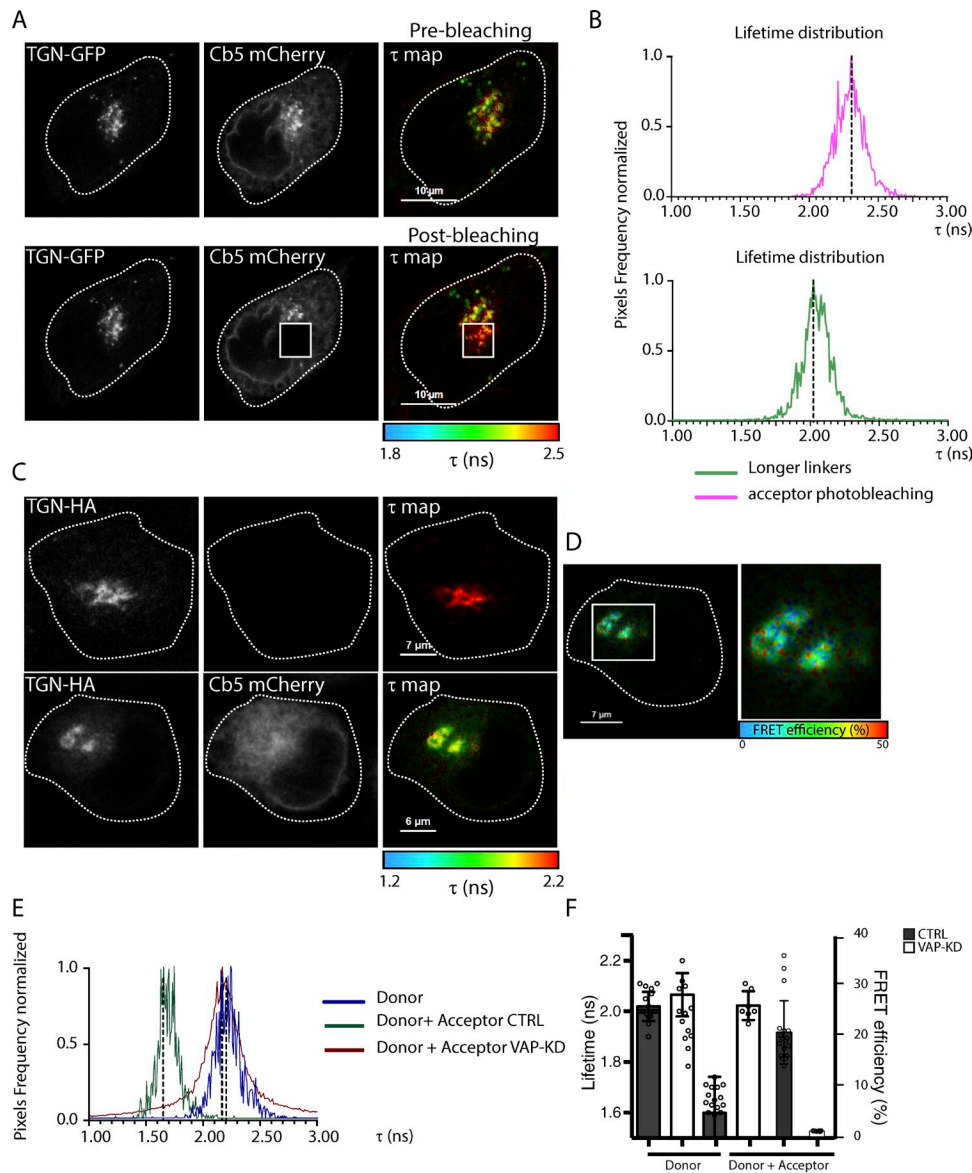

Figure S1. **Validation of the FRET-FLIM approach to visualize ERTGoCS.** **(A)** Immunofluorescence (IF) images (gray) and FLIM (in color) showing donor (TGN46-GFP) lifetime in the presence of the acceptor (mCherry-Cb5) before and after photobleaching of the acceptor in the squared region. The FLIM images show the spatial variation of the mean fluorescence lifetime ( $\tau$ ) of TGN46-GFP (donor):  $\tau$  values are represented by a pseudocolor scale ranging from 1.8 to 2.5 ns. After acceptor photobleaching, the TGN46-GFP lifetime becomes longer, almost identical to lifetime measurements of donor alone (Fig. 2 D). **(B)** The  $\tau$  value distribution curves of the donor when using reporter proteins after acceptor photobleaching (top) and with the longer form of the linkers (bottom). **(C)** FLIM (in color) and (gray) images of HeLa cells expressing the TGN46-HA (donor) alone (top) or TGN46-HA and mCherry-Cb5 (donor+acceptor; bottom). HA was detected using the Alexa Fluor 430-conjugated anti-HA antibody. The FLIM images show the spatial variation of the mean fluorescence lifetime ( $\tau$ ) of Alexa Fluor 430:  $\tau$  values are represented by a pseudocolor scale ranging from 1.2 to 2.2 ns. **(D)** The spatial distribution of the FRET efficiency (FRET [%] map) is depicted (color scale ranges from 0 to 50%). **(E)** Mean  $\tau$  value distribution curves of Alexa Fluor 430 (donor) conjugated with anti-HA antibody in cells expressing TGN46-HA alone (blue line) or TGN46-HA and mCherry-Cb5 (green line) in control cells and TGN46-HA and mCherry-Cb5 in VAP-KD cells (red line). **(F)** Quantification of average donor lifetime and FRET efficiency in donor alone or donor+acceptor in control and VAP-KD HeLa cells.  $n = 20$ . Data are means  $\pm$  SD; Student's  $t$  test.

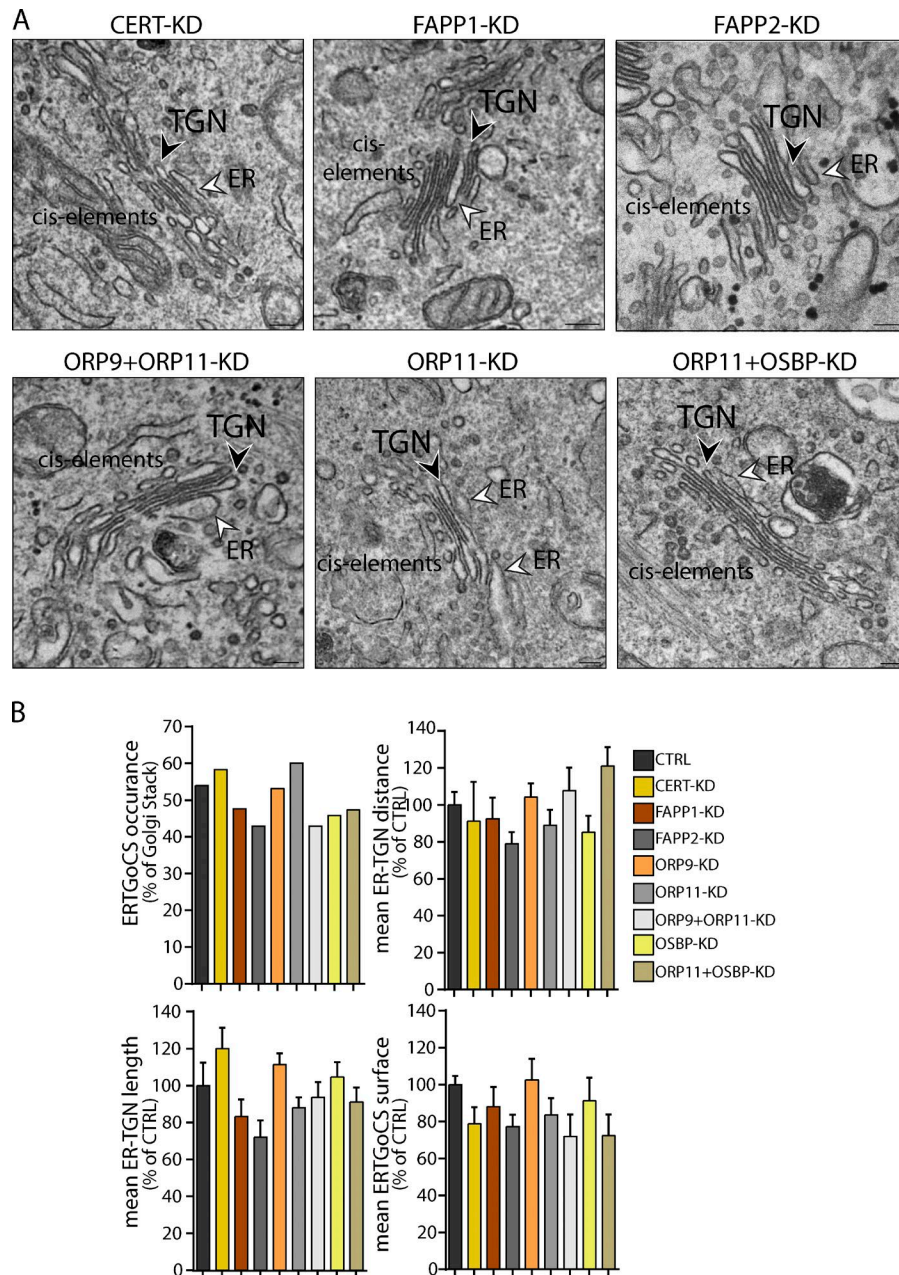

Figure S2. **Morphometric analysis of ERTGoCS in cells depleted of lipid transfer proteins found to be dispensable for ERTGoCS integrity by FLIM-FRET.** (A) Electron micrographs of CERT-KD, FAPP1-KD, FAPP2-KD, ORP9+ORP11-KD, ORP11-KD, and ORP11+OSBP-KD cells. Scale bar, 200 nm. (B) Quantification of ERTGoCS occurrence, mean ERTGoCS distance, length, and surface corresponding to the knockdown conditions analyzed in A. Quantifications were performed as in Fig. 1, B and C, and as described in Materials and methods. Data are mean  $\pm$  SEM; Student's *t* test. *n* = 20–30 Golgi stacks. No condition was significantly different compared with the control.

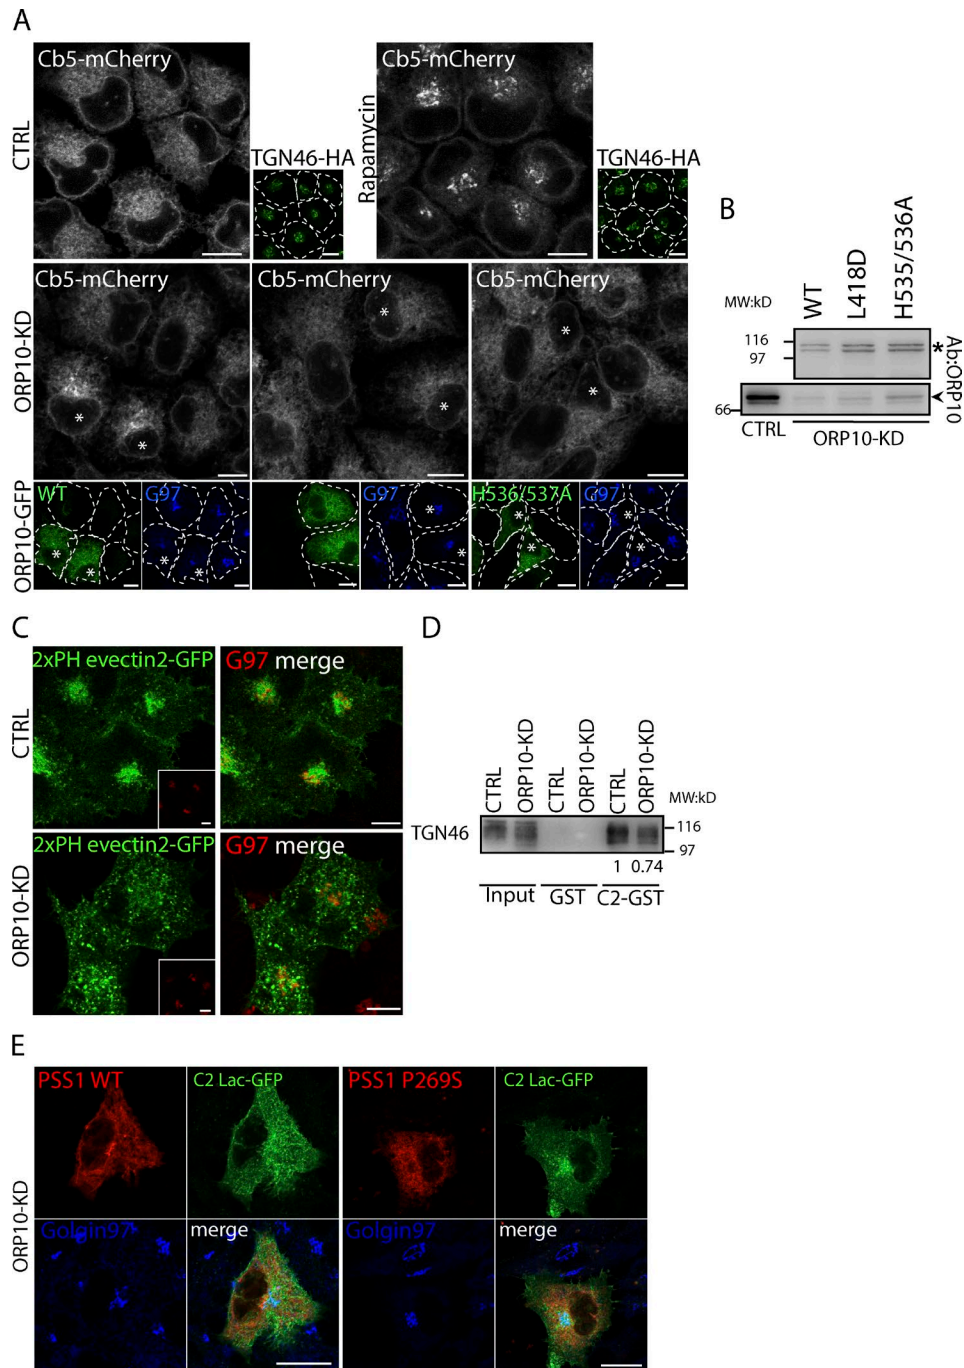

**Figure S3. ORP10 controls PS levels at the TGN. (A)** Immunofluorescence images related to Fig. 5 D. In the top row, control (CTRL) HeLa cells stably expressing the TGN46-FRB-HA and mCherry-T2A-FKBP-Cb5 reporter proteins were left untreated (left) or were treated with 200 nM rapamycin for 2 min (right). After treatment with rapamycin, the two probes heterodimerize stabilizing mCherry-Cb5 at the TGN46-HA-positive area (insets). In the bottom two rows, ORP10-KD cells stably expressing the TGN46-FRB-HA-mCherry-FKBP-Cb5 construct were transfected with GFP-tagged WT or mutant forms (L418D and H535/536A) of ORP10 and were treated with 200 nM rapamycin for 2 min. Asterisks mark overexpressing cells. Quantification was based on mCherry-Cb5 colocalization with TGN46 (see Materials and methods). Golgin-97 staining (blue). Scale bar, 10  $\mu$ m. **(B)** Expression levels of the WT or mutant forms (L418D and H535/536A) of ORP10 in ORP10-KD cells evaluated by Western blot with anti-ORP10 antibody. The arrowhead and the asterisk indicate endogenous and GFP-tagged ORP10, respectively. **(C)** Mock (CTRL) and ORP10-KD cells were probed for PS localization using the GFP-tagged 2xPH domain of evectin2 (Uchida et al., 2011). Cells were colabeled with the Golgi marker Golgin-97 (insets) and show similar results obtained in Fig. 5 E. Scale bar, 10  $\mu$ m. **(D)** PS-affinity isolation of TGN membranes. Postnuclear supernatants (see Materials and methods) from control (CTRL) and ORP10-KD cells were preincubated with the LacC2 domain fused to GST (C2-GST) or with GST and then incubated with glutathione magnetic beads. Subcellular fractions retained on the beads were eluted with sample buffer and analyzed by SDS-PAGE and Western blot with anti-TGN46 antibody. Numbers indicate the ratio between TGN46 retained on the beads and TGN present in the input and are expressed as the percentage of control. **(E)** PS distribution in ORP10-KD cells expressing mCherry-tagged WT (WT mCherry) or constitutively active (P269SmCherry) PS synthase 1, using the C2 domain of lactadherin (C2-Lact-GFP; top row). The bottom row shows Golgin-97 staining. Scale bar, 10  $\mu$ m.

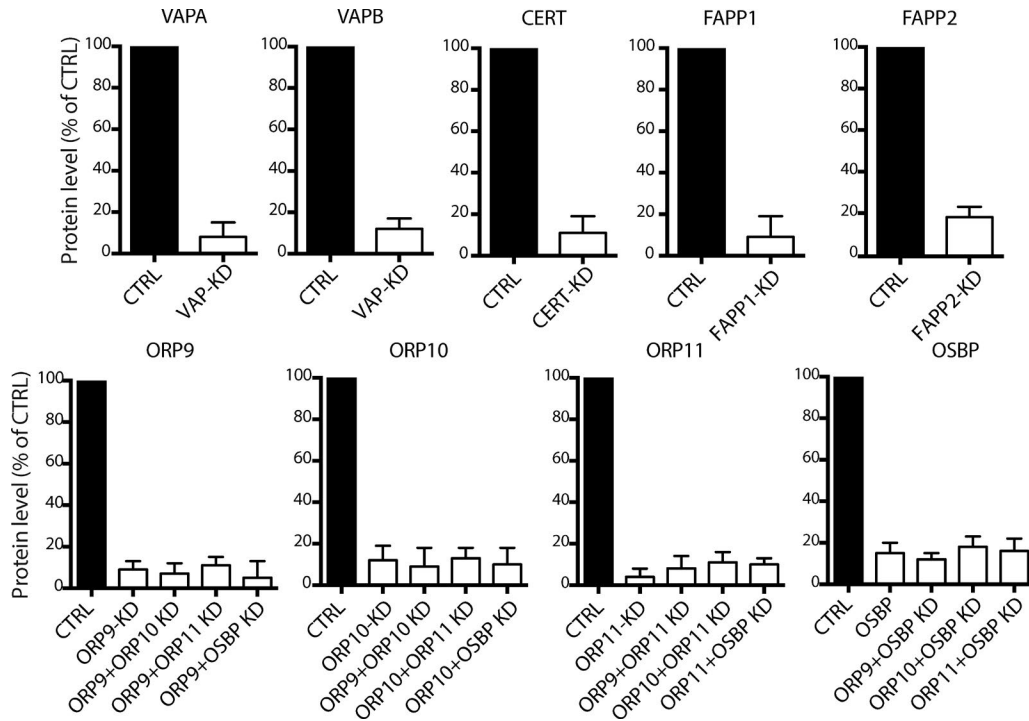

Figure S4. **Effect of the siRNAs used in the study on target protein levels.** Quantification by Western blot of the indicated proteins targeted by the indicated siRNAs. Means  $\pm$  SD of three independent experiments.

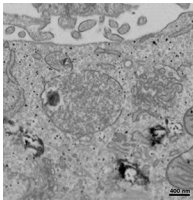

Video 1. **FIB-SEM analysis of ERTGoCS.** 3D organization of ERTGoCS in HepG2 cells analyzed by FIB-SEM. The ER is highlighted in red and the TGN is highlighted in green.

Table S1. List of primers and cloning strategies used in this study

| Plasmid                                               | Template for PCR                                          | Primer set                                                                                                                                                                                                                                                                                                                                                     | Vector backbone                 | Enzyme sites                                                                                                                                         |
|-------------------------------------------------------|-----------------------------------------------------------|----------------------------------------------------------------------------------------------------------------------------------------------------------------------------------------------------------------------------------------------------------------------------------------------------------------------------------------------------------------|---------------------------------|------------------------------------------------------------------------------------------------------------------------------------------------------|
| TGN46-FRB-HA-GFP                                      |                                                           | Subcloned from TGN46-FRB-HA-CFP                                                                                                                                                                                                                                                                                                                                | pEGFP-N1                        | Nhe I/Age I                                                                                                                                          |
| mCherry-FKBP                                          | FKBP cDNA                                                 | 5'-GAAGGATCCAGGGGGAATGGGAGTGCAGGTGGA<br>AAC-3'/5'-CTAAGATCTCCGCTCCCTCCAGTTTAGA<br>AGTCCACA-3'                                                                                                                                                                                                                                                                  | pmCherryC3                      | BglII                                                                                                                                                |
| mCherry-FKBP-Cb5                                      | Venus-C17                                                 | 5'-GCCGAATTCTGGGTGGAGGAGTTCAGGAG-3'/<br>5'-GAGGGTACCGCTCATTATCTTCAGCCATGTACA-3'                                                                                                                                                                                                                                                                                | mCherry-FKBP                    | EcoR I/Kpn I                                                                                                                                         |
| mCherry-FKBP-C17-IRES-neo2                            | mCherry-FKBP-C17                                          | 5'-AATACCGGTACCATGGTGGAGCAAGGGCG-3'/<br>5'-CTTGCGGCGCTCATTATCTTCAGCCATG-3'                                                                                                                                                                                                                                                                                     | pIRES-neo2                      | AgeI/NotI                                                                                                                                            |
| T2A-mCherry-FKBP-C17-IRES-neo2                        | Primer annealing                                          | 5'-TTAAGACCGGTGAGGGCAGGGGCAGCCTGTGA<br>CCTGCGGCGACGTGGAGGAAAACCTGGCCCT-3'/<br>5'-CCGGAGGGGCCAGGGTTTTCTCCACGTCGCGC<br>CAGGTCAGCAGGCTGCCCTGCCCTACCGGTC-3'                                                                                                                                                                                                        | mCherry-FKBP-C17-IRES-neo2      | AflII/AgeI                                                                                                                                           |
| TGN46-FRB-HA-GFP-T2A-mCherry-FKBP-C17-pIRES-neo2      | TGN46-FRB-HA-GFP                                          | 5'-TATGCTAGCACCACCATGCGGTTCTGTAGT-3'/5'-TAT<br>ACCGGTTCCCTTGACAGCTCGTCCATGC-3'                                                                                                                                                                                                                                                                                 | mCherry-FKBP-C17-T2A-pIRES-neo2 | AgeI/NotI                                                                                                                                            |
| TGN46-FRB-HA-T2A-mCherry-FKBP-C17-pIRES-neo2          | TGN46-FRB-HA-GFP                                          | 5'-TATGCTAGCACCACCATGCGGTTCTGTAGT-3'/<br>5'-GTCACCGGTGCGTGTAGTCTGGTACGTCG-3'                                                                                                                                                                                                                                                                                   | T2A-mCherry-FKBP-C17-pIRES-neo2 | NheI/AgeI                                                                                                                                            |
| pmCherry-N1-FKBP                                      | FKBP cDNA                                                 | 5'-GAAGGATCCAGGGGGAATGGGAGTGCAGGTGGA<br>AAC-3'/5'-CTAAGATCTCCGCTCCCTCCAGTTTAGA<br>AGTCCACAT-3'                                                                                                                                                                                                                                                                 | pmCherry-N1                     | BamHI                                                                                                                                                |
| PH-FFAT-FLAG                                          | PH-FFAT-CHERRY                                            | 5'-GAGAGATCTACTGGGGCTCGGGCGG-3'/<br>5'-TATGTCGACTCTGGTTCTCTTTTCTTTTGG-3'                                                                                                                                                                                                                                                                                       | p3XFLAG (CMV-14)                | BglII/Sall                                                                                                                                           |
| pmCHERRY-FKBP-C17-longer linker (Várnai et al., 2007) | Primer assembling for longer linker (Várnai et al., 2007) | First forward 5'-GGATCTGGTGTGGTGCAGGCGCT<br>GGCGCCAT-3'<br>Second reverse 5'-TCCCTAGCTGCTGCCTCTTTGCT<br>GCAGCTTCTTGGCAGCGGCTCTCTAGCGGGCT<br>TCAGAATTCAGAATGGCGCCAGCGCCTG-3'<br>Third forward 5'-GGCAGCAGCTAGGGAAGCAGCTGC<br>ACGTGAAGCCGACCCAGAGAGGCTGCTGCTCGCGA<br>AGCTGCCGCACGGGAAGCTGCTGTAGAAA-3'<br>Fourth reverse 5'-CACTCTGAATTTCTAGCAGCAGC<br>TTCCCGT-3' | pmCHE RRY-FKBP-C17              | PIPE vector primers: 5'-GAA<br>GCTGCTGTAGAAATCAAGA<br>GTGTCCGAACTCTGATCACT<br>ACCGTTG-3'/5'-GCCTGCACC<br>AGCACCAGATCTCCCTCCAG<br>TTTTAGAAGCTCCAC-3'  |
| TGN46-FRB-HA-GFP-longer linker (Várnai et al., 2007)  | pmCHERRY-FKBP-C17-longer linker (Várnai et al., 2007)     | 5'-GGATCTGGTGTGGTGCAGGCGCTGGCGCCAT-3'/<br>5'-CACTCTGAATTTCTAGCAGCAGCTTCCCGT-3'                                                                                                                                                                                                                                                                                 | TGN46-FRB-HA-GFP                | PIPE vector primers: 5'-GAA<br>GCTGCTGTAGAAATCAAGA<br>GTGTATCTAGAAATCCTCTGG<br>CATGAG-3' and 5'-GCCTGC<br>ACCAGCACCAGATCCGGGATC<br>CGACTTCTGGTCCA-3' |
| GFP-2XPH ERECTIN                                      | cDNA ERECTIN                                              | First PH: 5'-AGATCTCGAGCTCAAGCTTCAATTCT<br>ATGGCGTTTGTGAAGAGTGGC-3'/5'-CGCCATGGTACC<br>GTCGACGTTTGTCTAGAAATCTTGGAGT-3'<br>Second PH: 5'-GGACAAACGTCGACGGTACCATGGCGT<br>TTGTGAAGAGTGG-3'/5'-TCAGTTATCTAGATCCGG<br>TGGATCCTCAGTTTGTCTAGAAATCTTGGAGT-3'                                                                                                           | pEGFP-C1                        | PIPE vector primers: 5'-GGA<br>TCCACCGGATCTAGATAA<br>CTGA-3'/5'-GAATTCGAAGCT<br>TGAGCTCGAGATCT-3'                                                    |
| GST-TEV- C2-Lact                                      | C2-Lact-GFP                                               | 5'-GGTGGGGGTGGATCAGGAAGTGAAGAAAACCTG<br>TACTTCAGAGTGGGTCAGTTCTGGAGGATCCAG<br>GAATTCTGCACTGAACCCCTAGGC-3'/5'-CACGATGCG<br>GCCGCTCGAGCTAACAGCCAGCAGCTCC-3'                                                                                                                                                                                                       | pGEX                            | PIPE vector primers: 5'-GAG<br>CGGCCGCATCGTG-3'/5'-CTT<br>CACTTCCTGATCCACCCAC<br>CTTTGGAGGATGGTCGCC-3'                                               |
| GFP-ORP10                                             | pEGFP-C1                                                  | Subcloned from pEGFP-C1                                                                                                                                                                                                                                                                                                                                        | CHERRY-ORP10 siRNA resistant    | AgeI/HindIII                                                                                                                                         |

Table S1. List of primers and cloning strategies used in this study (*Continued*)

| Plasmid                      | Template for PCR | Primer set                                                                                                                                                                                                                                                                                                                                                                                                                                                                                                        | Vector backbone           | Enzyme sites |
|------------------------------|------------------|-------------------------------------------------------------------------------------------------------------------------------------------------------------------------------------------------------------------------------------------------------------------------------------------------------------------------------------------------------------------------------------------------------------------------------------------------------------------------------------------------------------------|---------------------------|--------------|
| CHERRY-ORP10 siRNA resistant | CHERRY-ORP10     | First pair: 5'-ACTCAGCTTCGAGCTTGTGCCAAGTATCATATGGAGATGAATTCTAAGAGTGCTC-3'/5'-GAGCACTCTTAGAATTCATCTCCATATGATACTTGGCAC AAGCTCGAAGCTGAGT-3'<br><hr/> Second pair: 5'-TAAGGAAGAGACGGAATTGGGCGT CATGGAGGACCAAAGATCAATAATTCTTCATCTCAT TTCACAACCTCAAACCT-3'/5'-AAGTTTGAGTTGTGA AATGAGATGAAGAATTATTGATCTTTGGTCTCCAT GACGCCAATCCGTCTCTCCTTA-3'<br><hr/> Third pair: 5'-CACAGGGTTACCGCAGAAGTGAAGCAT AATCCACAATAACAATTGTTTGTAAGCCCATGGG GAATG-3'/5'-CATTCCCATGGGCTTTACAAACAATT GTATTTGTGGGATTATGCTTCACTTCTGCGGTAACC CTGTG-3' | Site-directed mutagenesis |              |
| ORP10-L418D                  |                  | 5'-GATTTGACCAAGGTGGTGGATCCTACCTTTATCCTG GAGAAGC-3'/5'-GCTTCTCCAGGATAAAGGTAGGAT CCACCACTGGTCAAATC-3'                                                                                                                                                                                                                                                                                                                                                                                                               | Site-directed mutagenesis |              |
| ORP10-H535/536A              |                  | 5'-GTTTGTGGCTGAGCAAGTGTCCGCTGCCCCACCCAT CTCCTGCT-3'/5'-AGCAGGAGATGGGTGGGGCAGCGG AACTTGCTCAGCCACAAAC-3'                                                                                                                                                                                                                                                                                                                                                                                                            | Site-directed mutagenesis |              |

Table S2. siRNA sequences used in this study

| Gene name | Duplex number | Sequence (sense strand)   |
|-----------|---------------|---------------------------|
| VAPA      | #1            | 5'-CCACAGACCUCAAUUCAA-3'  |
|           | #2            | 5'-GGCAAACCUGAUGAAUUA-3'  |
|           | #3            | 5'-CCUGAGAGAUGAAGGUUUA-3' |
|           | #4            | 5'-CAAGGAAACUAAUGGAAGA-3' |
| VAPB      | #1            | 5'-GUAAGAGGCUCAAGGUGA-3'  |
|           | #2            | 5'-CCACGUAGGUACUGUGUGA-3' |
|           | #3            | 5'-UGUUACAGCCUUUCGAUUA-3' |
|           | #4            | 5'-GUAAUUUUGGGAAGAUUG-3'  |
| FAPP1     | #1            | 5'-CGAAGACCUACUCAGUA-3'   |
|           | #2            | 5'-GCAUAAAGAUGGCAGUUUG-3' |
|           | #3            | 5'-UCACAACGCUUGAGGAAUG-3' |
|           | #4            | 5'-GAACCAGUAUCUACACUUC-3' |
| FAPP2     | #1            | 5'-GAGAUAGACUGCAGCAUUA-3' |
|           | #2            | 5'-GAAUUGAUGUGGGAACUUU-3' |
|           | #3            | 5'-GAAAUCAACCGUAAUACU-3'  |
|           | #4            | 5'-CCUAAGAAUCCAACAGAA-3'  |
| ORP9      | #1            | 5'-GAGGAGCACAAGAGCGUUA-3' |
|           | #2            | 5'-ACCAAGAAGUUGCCUUAUA-3' |
|           | #3            | 5'-GCUCAUAUCUGGACCAAU-3'  |
|           | #4            | 5'-CCAAAGCGCUAAUAGAUU-3'  |
| ORP10     | #1            | 5'-CAACCAACCAACCAUU-3'    |
|           | #2            | 5'-GGAUCAGCGUAGUAAUU-3'   |
|           | #3            | 5'-AAUACCACAUGGAAUGAA-3'  |
| ORP11     | #1            | 5'-GAGACUUAUUAGACGAU-3'   |
|           | #2            | 5'-GAAUCUGGACUUAUAGCGA-3' |
|           | #3            | 5'-GCGUGACAAUGGUUGGAGA-3' |
| OSBP1     | #1            | 5'-CACACUGUACACAACAUU-3'  |
|           | #2            | 5'-GAUAGAUCAGUCUGGCGAA-3' |
| CERT      | #1            | 5'-GAAGAUGACUUCCUACAA-3'  |
|           | #2            | 5'-GAAGUUGGCUGAAAUGGAA-3' |
|           | #3            | 5'-GCGAGAGUAUCCUAAUUU-3'  |
|           | #4            | 5'-UCAAGGGUAAGUGGUA-3'    |

## References

- Uchida, Y., J. Hasegawa, D. Chinnapen, T. Inoue, S. Okazaki, R. Kato, S. Wakatsuki, R. Misaki, M. Koike, Y. Uchiyama, et al. 2011. Intracellular phosphatidylserine is essential for retrograde membrane traffic through endosomes. *Proc. Natl. Acad. Sci. USA.* 108:15846–15851. <https://doi.org/10.1073/pnas.1109101108>
- Várnai, P., B. Tóth, D.J. Tóth, L. Hunyady, and T. Balla. 2007. Visualization and manipulation of plasma membrane-endoplasmic reticulum contact sites indicates the presence of additional molecular components within the STIM1-Orai1 Complex. *J. Biol. Chem.* 282:29678–29690. <https://doi.org/10.1074/jbc.M704339200>
